# Supplementary material
Source: publisher site journal article supplement (https://www.dovepress.com/article/352373)
Supplement: Supplementary file 1 [file get_supplementary_file.php]

# Supplementary materials

# Table S1 ROC curves for diagnosis of CC in GSE30759

| Variable | AUC | SE a | 95% CI b |
| --- | --- | --- | --- |
| cg10635061 | 1.000 | 0.000 | 0.943 to 1.000 |
| cg16428251 | 0.999 | 0.00196 | 0.940 to 1.000 |
| cg22341310 | 0.999 | 0.00196 | 0.940 to 1.000 |
| cg23316360 | 0.989 | 0.0115 | 0.923 to 1.000 |
| cg24019564 | 1.000 | 0.000 | 0.943 to 1.000 |
| combine | 1.000 | 0.000 | 0.943 to 1.000 |

# Table S2 ROC curves for diagnosis of CC in GSE30760

| Variable | AUC | SE a | 95% CI b |
| --- | --- | --- | --- |
| cg10635061 | 0.639 | 0.0449 | 0.571 to 0.703 |
| cg16428251 | 0.999 | 0.000817 | 0.981 to 1.000 |
| cg22341310 | 0.996 | 0.00238 | 0.976 to 1.000 |
| cg23316360 | 0.996 | 0.00333 | 0.975 to 1.000 |
| cg24019564 | 0.927 | 0.0202 | 0.884 to 0.958 |
| combine | 1.000 | 0.000 | 0.983 to 1.000 |

# Table S3 ROC curves for diagnosis of CC in GSE41384

| Variable | AUC | SE a | 95% CI b |
| --- | --- | --- | --- |
| cg10635061 | 0.578 | 0.139 | 0.334 to 0.797 |
| cg16428251 | 0.978 | 0.0266 | 0.786 to 1.000 |
| cg22341310 | 0.889 | 0.0821 | 0.661 to 0.985 |
| cg23316360 | 1.000 | 0.000 | 0.824 to 1.000 |
| cg24019564 | 0.656 | 0.133 | 0.406 to 0.854 |
| combine | 1.000 | 0.000 | 0.824 to 1.000 |

# Table S4 ROC curves for diagnosis of CC in GSE46306

| Variable | AUC | SE a | 95% CI b |
| --- | --- | --- | --- |
| cg10635061 | 0.554 | 0.148 | 0.368 to 0.729 |
| cg16428251 | 1.000 | 0.000 | 0.891 to 1.000 |
| cg22341310 | 0.804 | 0.0940 | 0.625 to 0.922 |
| cg23316360 | 1.000 | 0.000 | 0.891 to 1.000 |
| cg24019564 | 0.661 | 0.175 | 0.473 to 0.818 |
| combine | 1.000 | 0.000 | 0.891 to 1.000 |

# Table S5 ROC curves for diagnosis of CC in GSE99511

| Variable | AUC | SE a | 95% CI b |
| --- | --- | --- | --- |
| cg10635061 | 0.554 | 0.148 | 0.368 to 0.729 |
| cg16428251 | 1.000 | 0.000 | 0.891 to 1.000 |
| cg22341310 | 0.804 | 0.0940 | 0.625 to 0.922 |
| cg23316360 | 1.000 | 0.000 | 0.891 to 1.000 |
| cg24019564 | 0.661 | 0.175 | 0.473 to 0.818 |
| combine | 1.000 | 0.000 | 0.891 to 1.000 |

# Table S6 ROC curves for diagnosis of CC in TCGA

| Variable | AUC | SE a | 95% CI b |
| --- | --- | --- | --- |
| cg10635061 | 0.973 | 0.0166 | 0.948 to 0.988 |
| cg16428251 | 0.987 | 0.00637 | 0.967 to 0.996 |
| cg22341310 | 0.990 | 0.00665 | 0.972 to 0.998 |
| cg23316360 | 0.981 | 0.00866 | 0.958 to 0.993 |
| cg24019564 | 0.978 | 0.0104 | 0.955 to 0.991 |
| combine | 1.000 | 0.000 | 0.988 to 1.000 |


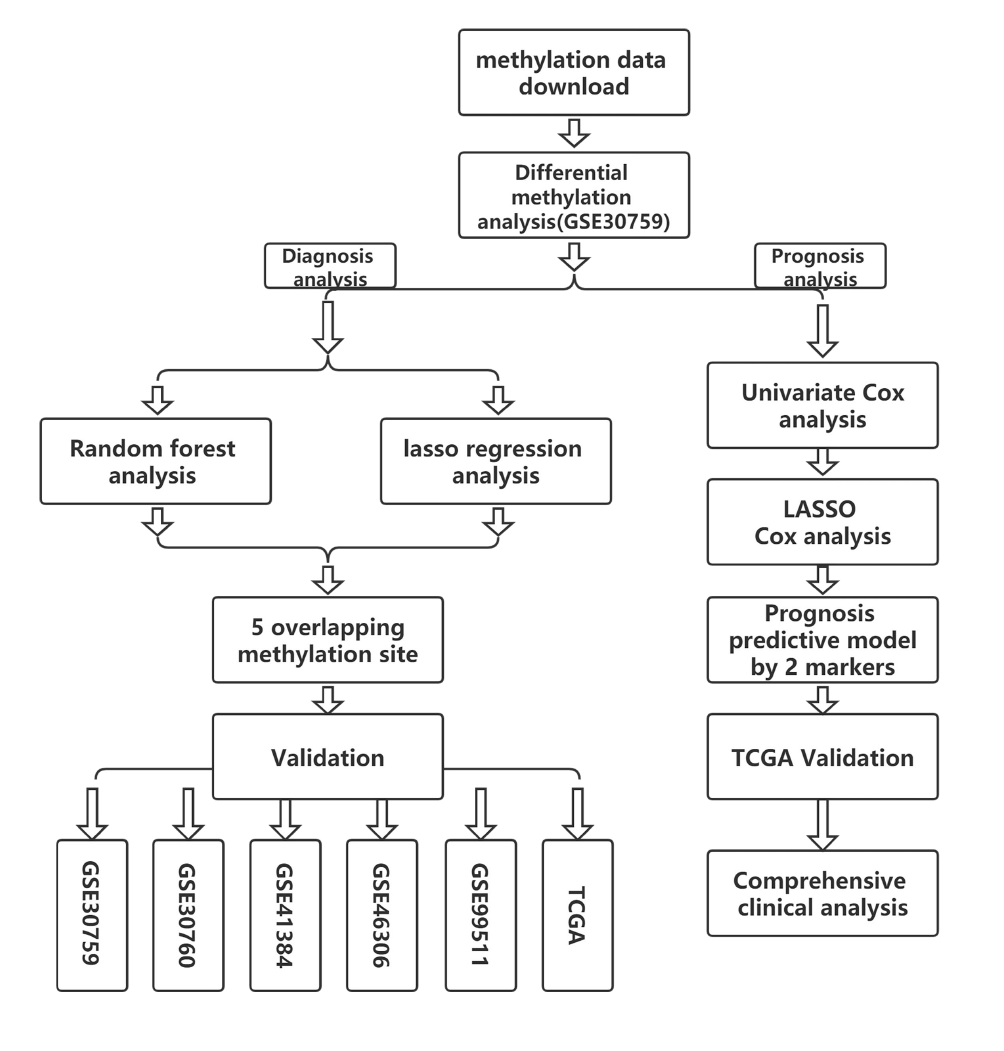


**Figure S1**: Workflow chart of data generation and analysis.


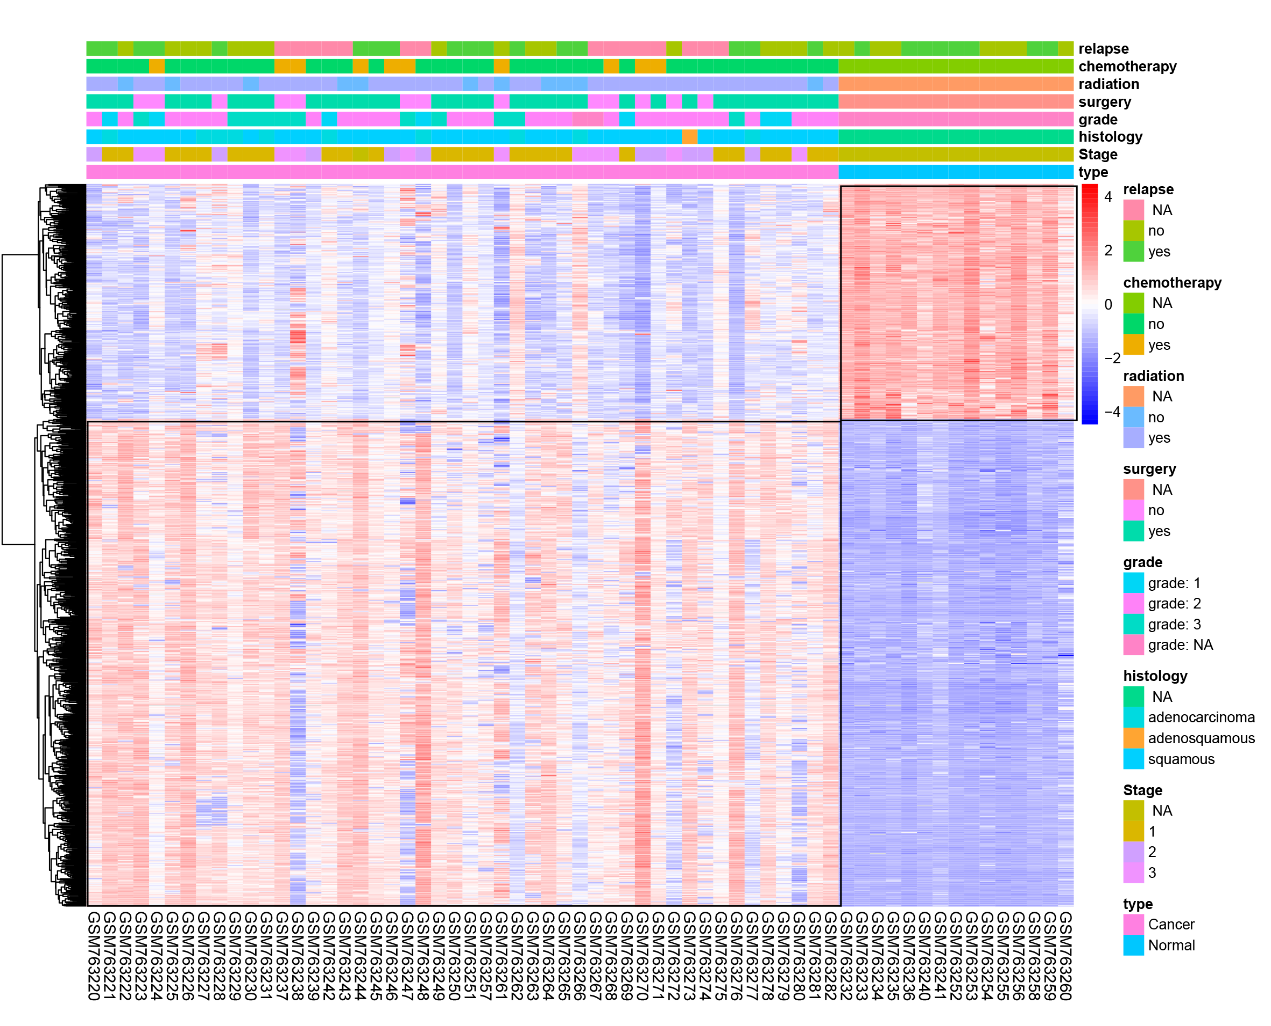


# Figure S2: Unsupervised hierarchical clustering of differentially methylated between CC and normal cohort.


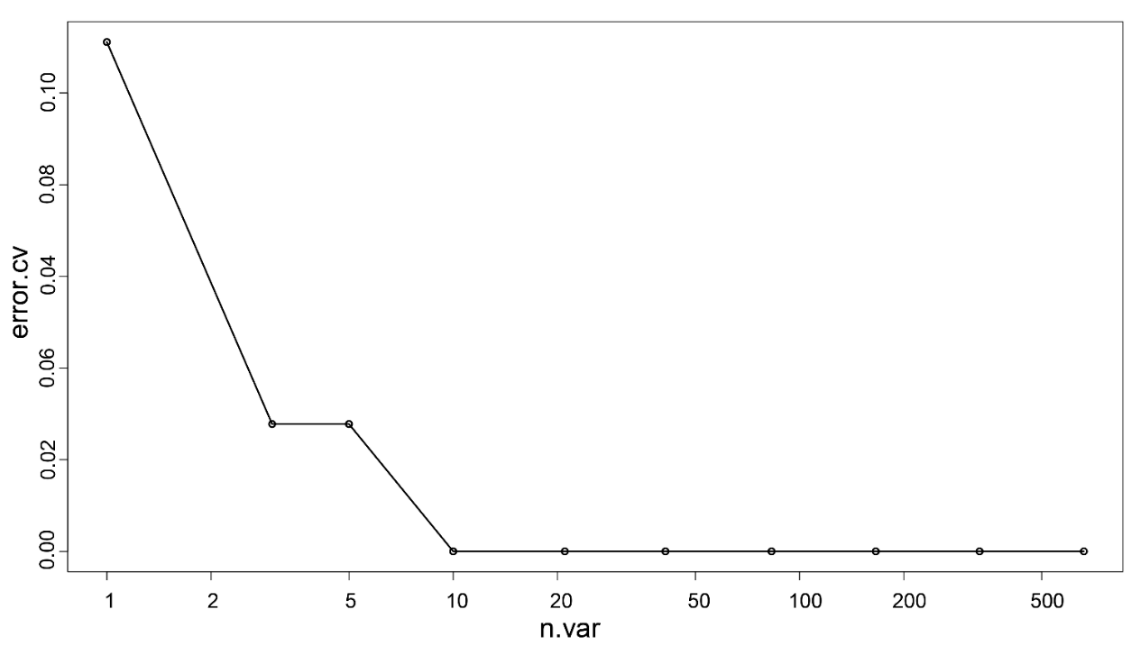


# Figure S3: Cross-validation results of Random forest visualized by broken line graph.


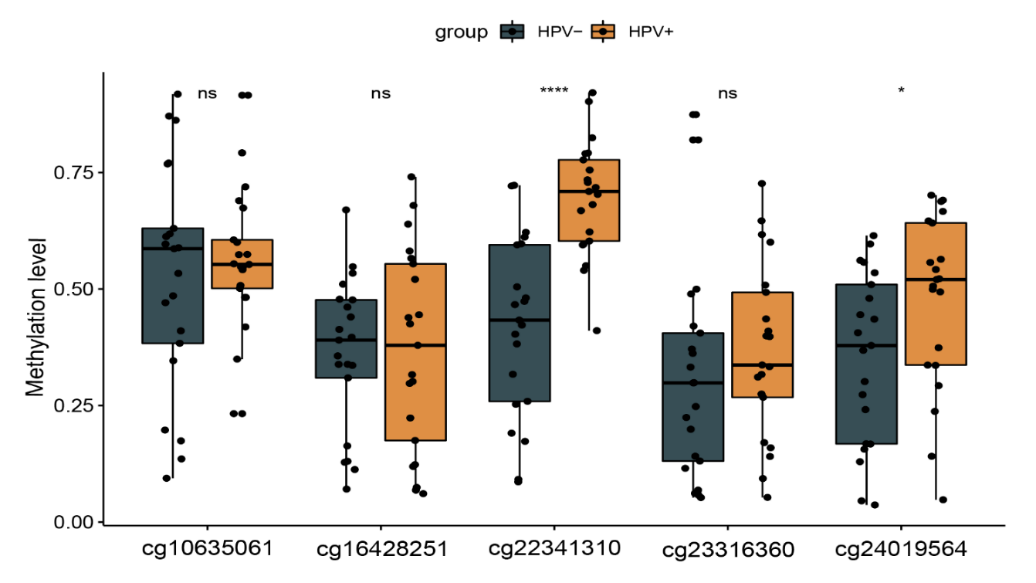


# Figure S4: Boxplot presenting the beta value distribution of the five markers in HPV (+) CC and HPV (-) CC. (ns not significant; *P < 0.05; **** P < 0.0001).


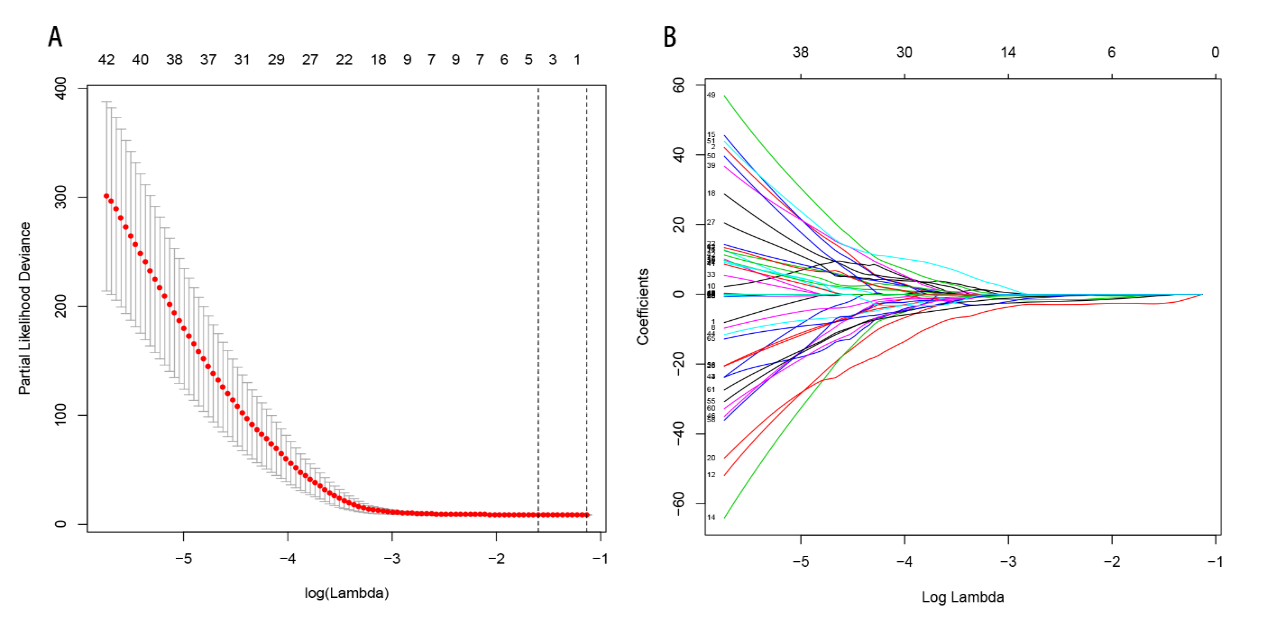


# Figure S5: Lasso cox regression model. (A) Lasso coefficient of the 81 candidate methylation markers; (B) Ten-fold cross-validation for tuning parameter selection in the Lasso module.


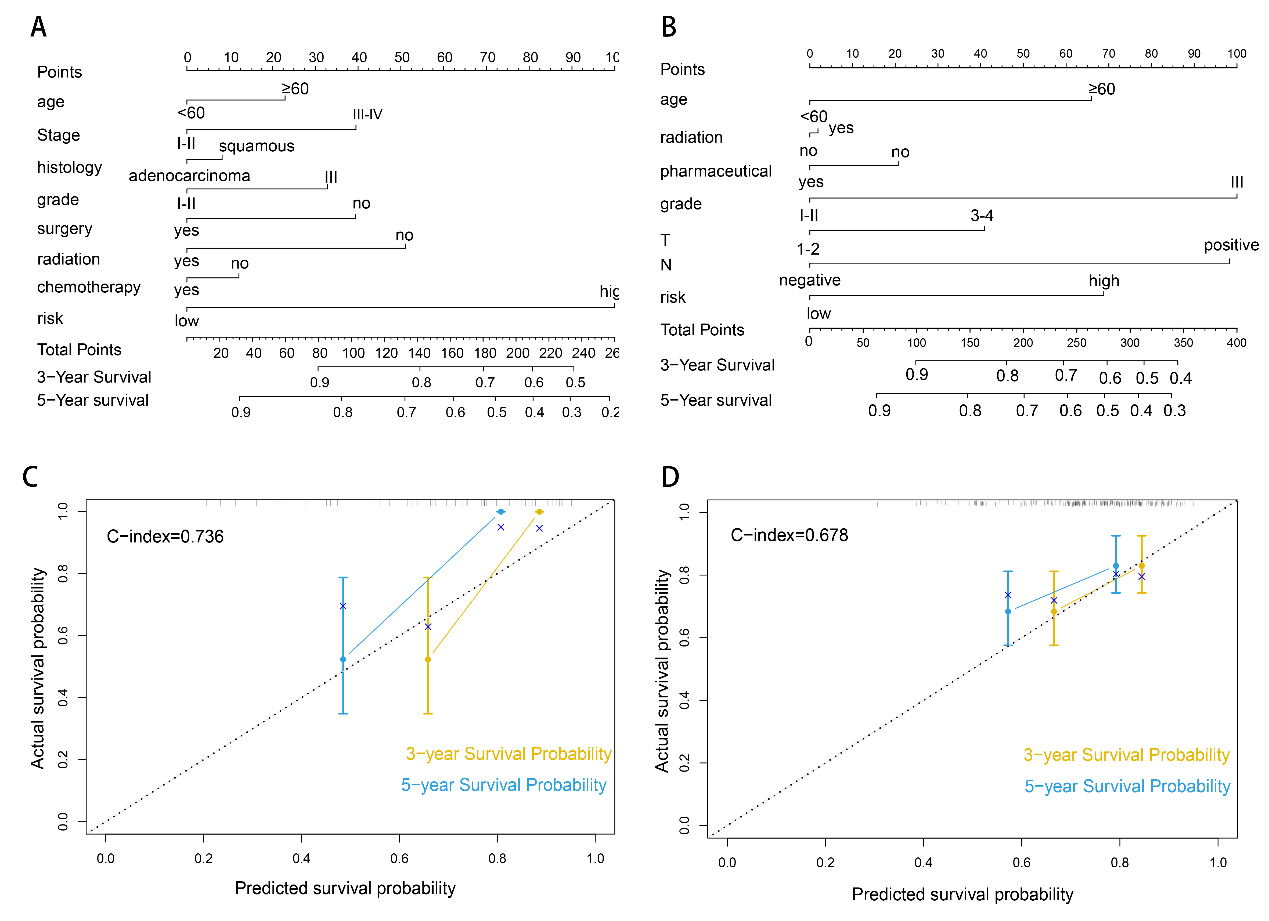


# Figure S6: Nomogram and calibration plot based on the two-DNA methylation prognostic prediction model. (A, B) The nomogram was constructed for predicting 3, 5-year survival rate of CC patients (A, GSE30597; B, TCGA). (C, D) The calibration curves for predicting patient survival at 3, and 5 years in the cohort (C, GSE30597; D, TCGA).
